# Supplementary material for: Autocatalytic Time-Dependent Evolution of Metastable Two-Component Supramolecular Assemblies to Self-Sorted or Coassembled State
Source: PubMed Central journal article supplement (PMC5445073; doi:10.1038/s41598-017-02524-3), 2017-05-25
Supplement: 41598_2017_2524_MOESM1_ESM.pdf [file 41598_2017_2524_MOESM1_ESM.pdf]

**Autocatalytic Time-Dependent Evolution of Metastable  
Two-Component Supramolecular Assemblies  
to Self-Sorted or Coassembled State**

Tomoya Fukui<sup>1,2</sup>, Masayuki Takeuchi<sup>1,2,\*</sup>, and Kazunori Sugiyasu<sup>1,\*</sup>

*<sup>1</sup>National Institute for Materials Science  
1-2-1 Sengen, Tsukuba, 305-0047 Ibaraki, Japan*

*<sup>2</sup>Department of Materials Science and Engineering, Graduate School of Pure and  
Applied Sciences, University of Tsukuba, 1-1-1 Tennodai, Tsukuba, 305-8577 Ibaraki,  
Japan*

*TAKEUCHI.Masayuki@nims.go.jp*

*SUGIYASU.Kazunori@nims.go.jp*

**Table of Contents**

|                                     |         |
|-------------------------------------|---------|
| 1. Materials and Methods            | page 2  |
| 2. Supplementary Figures and Tables | page 3  |
| 3. Supplementary References         | page 13 |

## 1. Materials and Methods

Unless otherwise noted, reagents and solvents were purchased from commercial suppliers without further purification. Compound **2**<sup>1</sup>, **5**<sup>2</sup>, and **6**<sup>2</sup> were prepared according to reported procedures. Ultraviolet–visible absorption spectra were recorded using a quartz cuvette of 1.0 or 0.1 cm path length on a Jasco V-630 spectrophotometer equipped with a Jasco ETCS-761 cell holder for temperature control. Atomic force microscopy (AFM) was performed on a Bruker model MultiMode 8 atomic force microscope under ambient conditions in the scan assist analysis. AFM images were analyzed with Bruker Nanoanalysis.

## 2. Supplementary Figures and Tables

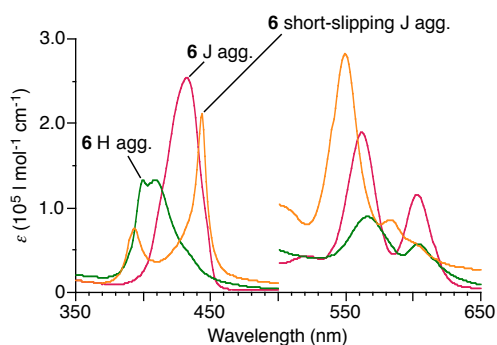

### Supplementary Figure S1.

Absorption spectra of J aggregate (pink), H aggregate (green), and short-slipping J aggregate (orange) of **6** in methylcyclohexane<sup>2</sup>.

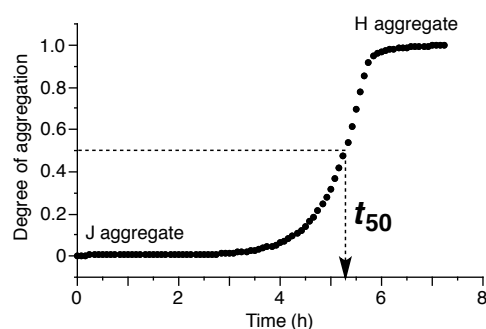

### Supplementary Figure S2.

Time profile of changes in the degree of aggregation of **1** H aggregate<sup>1</sup>.

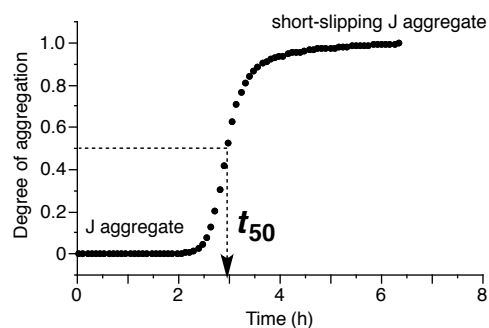

### Supplementary Figure S3.

Time profile of changes in the degree of aggregation of **6** short-slipping J aggregate<sup>2</sup>.

## Thermodynamic analysis of 2/6 J aggregate

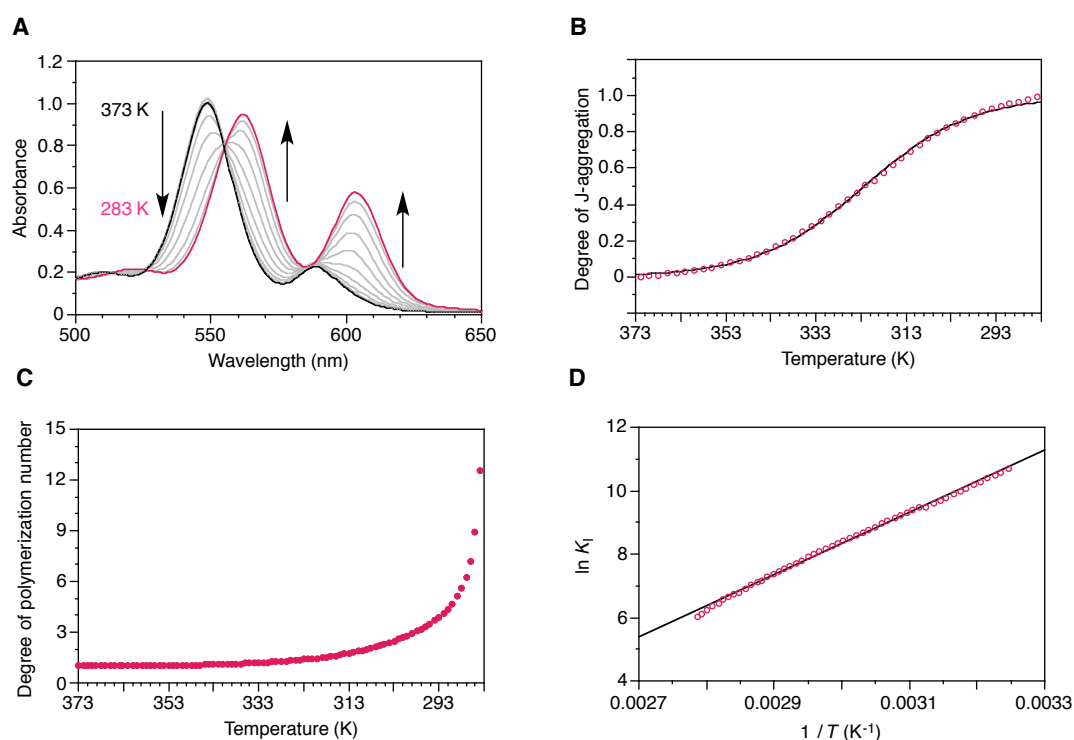

### Supplementary Figure S4.

(A) Temperature-dependent absorption spectra of 2/6 mixture (Q band) observed during the cooling process:  $[2]+[6] = 50 \mu\text{M}$  in MCH;  $[6]/\{[2]+[6]\} = 90\%$ . (B) Change in the degree of aggregation of 2/6 J aggregate as a function of temperature obtained by fitting the apparent absorption coefficients at  $\lambda = 561 \text{ nm}$  to the isodesmic model (Supplementary Equation 1)<sup>3</sup> in which  $\alpha_{\text{Mono}}$  is the degree of 2/6<sub>Mono</sub> (monomeric 2/6 mixture),  $\varepsilon_{\text{Mono}}$  and  $\varepsilon_{\text{J}}$  are the molar absorption coefficients of 2/6<sub>Mono</sub> and 2/6 J aggregate, respectively, and  $\varepsilon(T)$  is the apparent absorption coefficient at the given temperature. The fitting to the isodesmic model yielded  $\Delta H^\circ$  and  $T_m$  as summarized in Supplementary Table 1 (correlation coefficient of 0.999). (C) Degree of polymerization number of 2/6 mixture as a function of the temperature obtained by the isodesmic model (Supplementary Equation 2)<sup>3</sup>. (D) Plot of the natural logarithm of  $K_1$  as a function of the reciprocal temperature ( $T^{-1}$ ): van't Hoff plot showing a linear relationship (correlation coefficient of 0.997). The standard enthalpy change ( $\Delta H^\circ$ ) and standard entropy change ( $\Delta S^\circ$ ) for the formation of 2/6 J aggregate were determined using Supplementary Equation 3 in which  $R$  is the ideal gas constant.

$$\alpha_J = 1 - \alpha_{Mono} = 1 - \frac{\varepsilon(T) - \varepsilon_J}{\varepsilon_{Mono} - \varepsilon_J} = \frac{1}{1 + \exp\left[-0.908\Delta H^\circ \frac{T - T_m}{RT_m^2}\right]} \quad (1)$$

$$DP_N = \frac{1}{\sqrt{1 - \alpha(T)}} = \frac{1}{2} + \frac{1}{2}\sqrt{4K_I(T)c_T + 1} \quad (2)$$

$$\ln K_I = \frac{-\Delta H^\circ}{RT} + \frac{\Delta S^\circ}{R} \quad (3)$$

Summary of thermodynamic analyses of 2/6 J aggregate

**Supplementary Table S1.** Thermodynamic parameters.

| [6]/{[2]+[6]}<br>(%) | isodesmic model <sup>3</sup>                |              | van't Hoff plot                             |                                                            |                                                      |
|----------------------|---------------------------------------------|--------------|---------------------------------------------|------------------------------------------------------------|------------------------------------------------------|
|                      | $\Delta H^\circ$<br>(kJ mol <sup>-1</sup> ) | $T_m$<br>(K) | $\Delta H^\circ$<br>(kJ mol <sup>-1</sup> ) | $\Delta S^\circ$<br>(J mol <sup>-1</sup> K <sup>-1</sup> ) | $\Delta G^\circ$ at 308 K<br>(kJ mol <sup>-1</sup> ) |
| <b>100</b>           | -81                                         | 322          | -82                                         | -176                                                       | -27.5                                                |
| <b>90</b>            | -83                                         | 323          | -83                                         | -183                                                       | -27.6                                                |
| <b>80</b>            | -83                                         | 322          | -84                                         | -185                                                       | -27.6                                                |
| <b>70</b>            | -83                                         | 323          | -84                                         | -184                                                       | -27.7                                                |

Time-dependent evolution of metastable two-component 2/6 J aggregate.

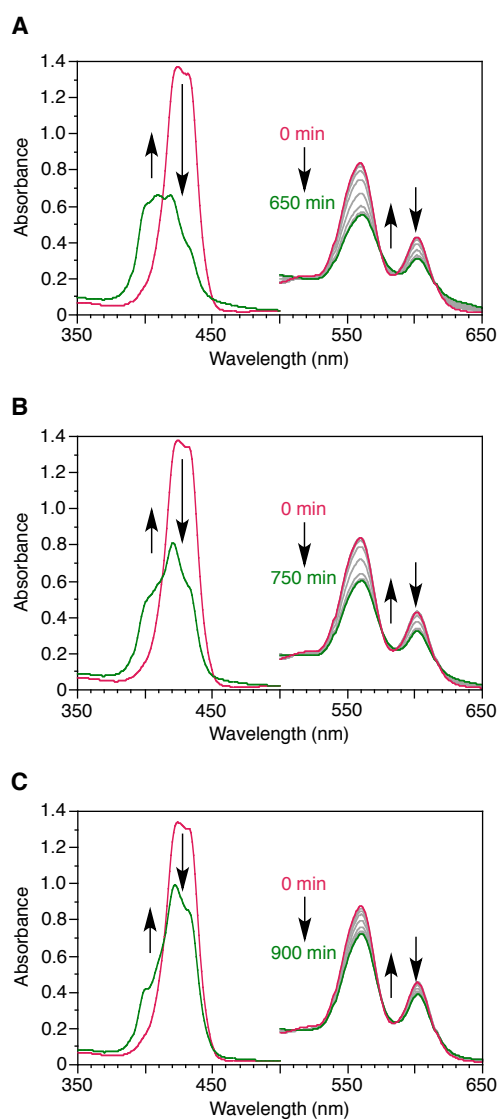

**Supplementary Figure S5.**

(A–C) Time-dependent absorption spectral changes of two-component 2/6 J aggregate :  $[2]+[6] = 50 \mu\text{M}$ ;  $[6]/\{[2]+[6]\} =$  (A) 90%, (B) 80%, and (C) 70%.

## Thermodynamic analysis of 5/6 J aggregate

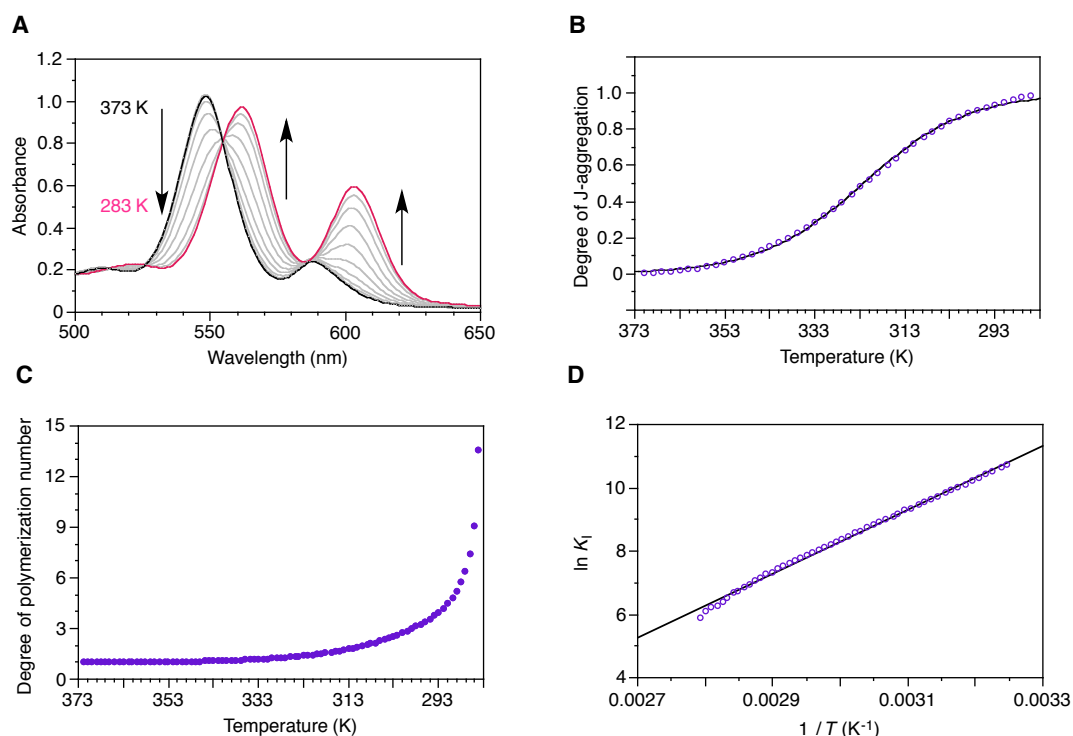

### Supplementary Figure S6.

(A) Temperature-dependent absorption spectra of 5/6 mixture (Q band) observed during the cooling process:  $[5]+[6] = 50 \mu\text{M}$  in MCH;  $[6]/\{[5]+[6]\} = 50\%$ . (B) Change in the degree of aggregation of 5/6 J aggregate as a function of temperature obtained by fitting the apparent absorption coefficients at  $\lambda = 561 \text{ nm}$  to the isodesmic model (Supplementary Equation 1)<sup>3</sup> in which  $\alpha_{\text{Mono}}$  is the degree of 5/6<sub>Mono</sub> (monomeric 5/6 mixture),  $\epsilon_{\text{Mono}}$  and  $\epsilon_J$  are the molar absorption coefficients of 5/6<sub>Mono</sub> and 5/6 J aggregate, respectively, and  $\epsilon(T)$  is the apparent absorption coefficient at the given temperature. The fitting to the isodesmic model yielded  $\Delta H$  and  $T_m$  as summarized in Supplementary Table 2 (correlation coefficient of 0.999). (C) Degree of polymerization number of 5/6 mixture as a function of the temperature obtained by the isodesmic model (Supplementary Equation 2)<sup>3</sup>. (D) Plot of the natural logarithm of  $K_I$  as a function of the reciprocal temperature ( $T^{-1}$ ): van 't Hoff plot showing a linear relationship (correlation coefficient of 0.997). The standard enthalpy change ( $\Delta H^\circ$ ) and standard entropy change ( $\Delta S^\circ$ ) for the formation of 5/6 J aggregate were determined using Supplementary Equation 3 in which  $R$  is the ideal gas constant.

Summary of thermodynamic analyses of 5/6 J aggregate

**Supplementary Table S2.** Thermodynamic parameters.

| [6]/{[5]+[6]}<br>(%) | isodesmic model <sup>3</sup>                |              | van't Hoff plot                             |                                                            |                                                      |
|----------------------|---------------------------------------------|--------------|---------------------------------------------|------------------------------------------------------------|------------------------------------------------------|
|                      | $\Delta H^\circ$<br>(kJ mol <sup>-1</sup> ) | $T_m$<br>(K) | $\Delta H^\circ$<br>(kJ mol <sup>-1</sup> ) | $\Delta S^\circ$<br>(J mol <sup>-1</sup> K <sup>-1</sup> ) | $\Delta G^\circ$ at 308 K<br>(kJ mol <sup>-1</sup> ) |
| <b>100</b>           | -81                                         | 322          | -82                                         | -176                                                       | -27.5                                                |
| <b>90</b>            | -82                                         | 322          | -83                                         | -178                                                       | -27.6                                                |
| <b>80</b>            | -82                                         | 322          | -83                                         | -181                                                       | -27.5                                                |
| <b>70</b>            | -82                                         | 322          | -82                                         | -176                                                       | -27.5                                                |
| <b>60</b>            | -82                                         | 322          | -83                                         | -181                                                       | -27.6                                                |
| <b>50</b>            | -83                                         | 322          | -84                                         | -184                                                       | -27.6                                                |
| <b>40</b>            | -81                                         | 323          | -82                                         | -176                                                       | -27.6                                                |
| <b>30</b>            | -82                                         | 322          | -83                                         | -179                                                       | -27.6                                                |
| <b>20</b>            | -81                                         | 323          | -80                                         | -172                                                       | -27.6                                                |
| <b>10</b>            | -81                                         | 323          | -82                                         | -176                                                       | -27.6                                                |



Time-dependent evolution of metastable two-component 5/6 J aggregate.

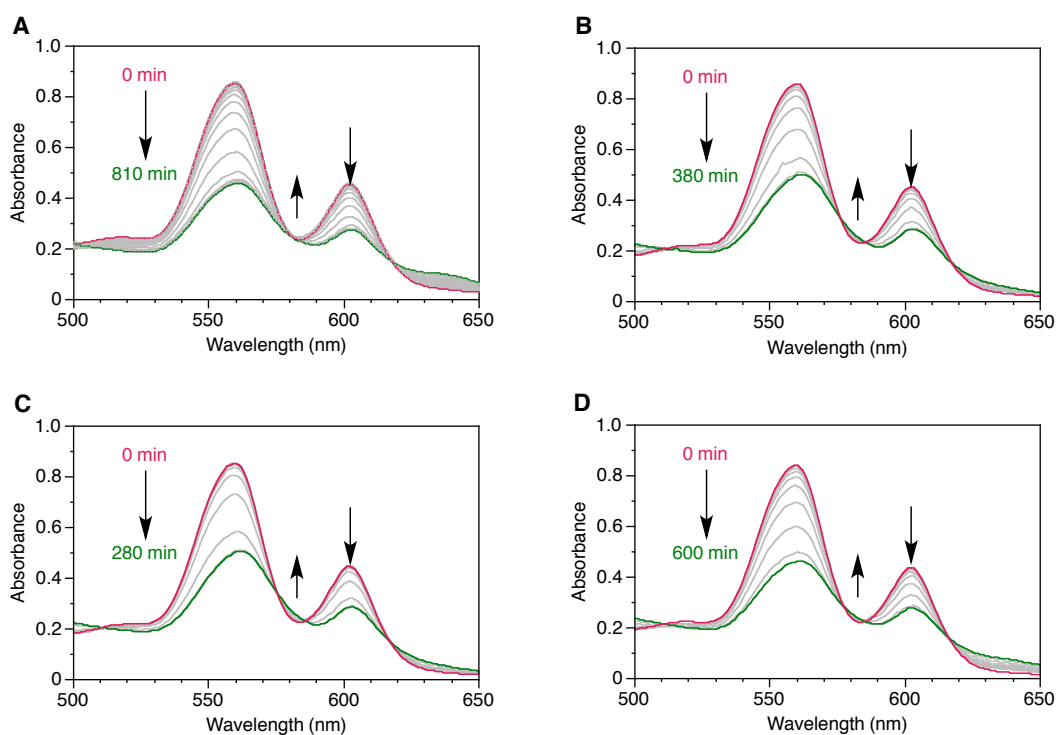

**Supplementary Figure S7.**

(A–D) Time-dependent absorption spectra changes of two-component 5/6 J aggregate :  $[5]+[6] = 50 \mu\text{M}$ ;  $[6]/\{[5]+[6]\} =$  (A) 0%, (B) 10%, (C) 50%, and (D) 90%.

## The stability of 5/6 H aggregate

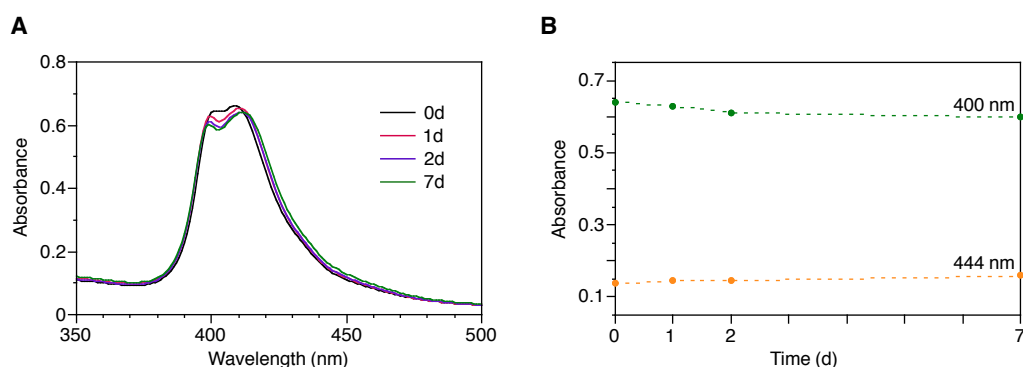

### Supplementary Figure S8.

(A) Time-dependent absorption spectra changes of 5/6 H aggregate:  $[5]+[6] = 50 \mu\text{M}$ ;  $[6]/\{[5]+[6]\} = 50\%$ . (B) Time profile of changes in the absorbance at 400 nm and 444 nm. Absorbance at 400 nm and 444 nm are characteristic of the H aggregate and the short-slipping J aggregate, respectively.

## The pseudo-self-sorted system of H aggregate and short-slipping J aggregate

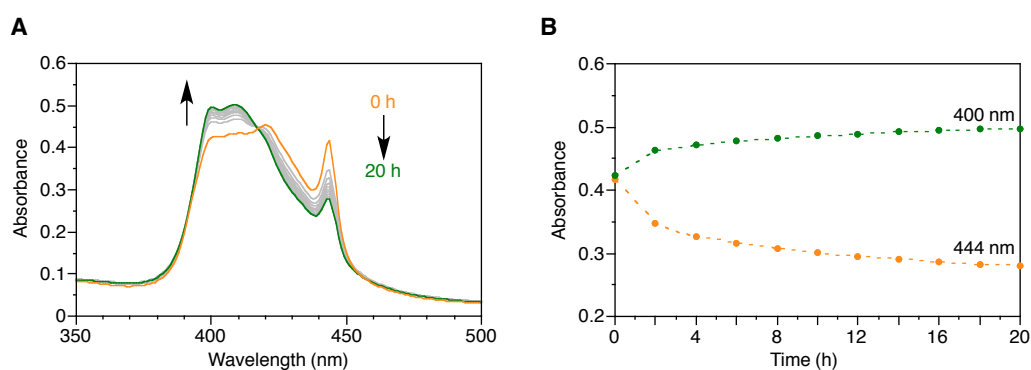

### Supplementary Figure S9.

(A) Time-dependent absorption spectra changes of mixture of 5 H aggregate and 6 short-slipping J aggregate:  $[5]+[6] = 50 \mu\text{M}$ ;  $[6]/\{[5]+[6]\} = 50\%$ . (B) Time profile of changes in the absorbance at 400 nm and 444 nm. Absorbance at 400 nm and 444 nm are characteristic of the H aggregate and the short-slipping J aggregate, respectively.

## Time-dependent evolution of 5/6 J aggregate.

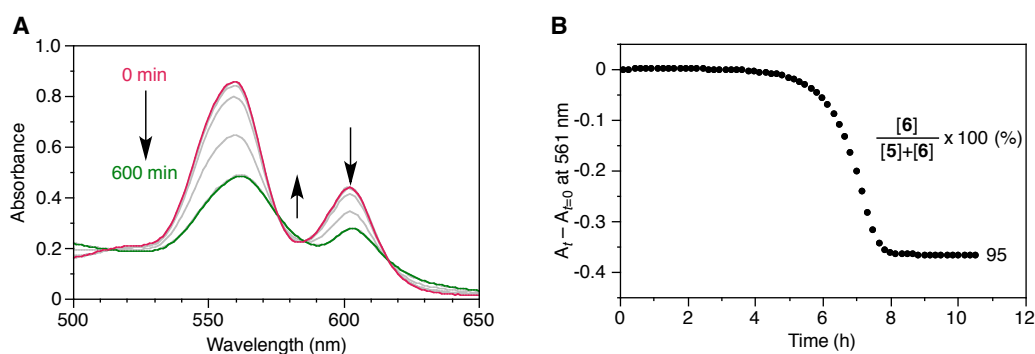

### Supplementary Figure S10.

(A) Time-dependent absorption spectra changes of two-component 5/6 J aggregate :  $[5]+[6] = 50 \mu\text{M}$ ,  $[6]/\{[5]+[6]\} = 95\%$ . (B) Time profile of change in the absorbance at 561 nm, a wavelength that is characteristic of the H aggregate:  $[5]+[6] = 50 \mu\text{M}$ ,  $[6]/\{[5]+[6]\} = 95\%$ .

### 3. Supplementary References

1. Ogi, S., Fukui, T., Jue, M. L., Takeuchi, M. & Sugiyasu, K. Kinetic control over pathway complexity in supramolecular polymerization through modulating the energy landscape by rational molecular design. *Angew. Chem. Int. Ed.* **53**, 14363-14367 (2014).
2. Fukui, T. *et al.*, Control over metastable supramolecular assembly in one and two dimensions. *Nat. Chem.* (doi:10.1038/nchem2684).
3. Smulders, M. M. J. *et al.* How to distinguish isodesmic from cooperative supramolecular polymerisation. *Chem. Eur. J.* **16**, 362–367 (2010).
